# Supplementary material for: Three-year durable efficacy of dolutegravir plus lamivudine in antiretroviral therapy – naive adults with HIV-1 infection
Source: PubMed Central journal article supplement — AIDS. 2021 Sep 15;36(1):39–48. doi: 10.1097/QAD.0000000000003070 (PMC8654248; doi:10.1097/qad.0000000000003070), 2021-09-15

**Supplemental Digital Content 2.** Trial profile through the completed double-blind (Day 1 to Week 96; gray boxes) and completed open-label (Week 96 to Week 148; black boxes) phases. Further details of eligibility and detailed disposition were published in Cahn et al 2020 [7]. AE, adverse event; DTG, dolutegravir; FTC, emtricitabine; 3TC, lamivudine; TDF, tenofovir disoproxil fumarate. <sup>a</sup>One participant withdrew after the double-blind phase and did not enter the open-label phase.

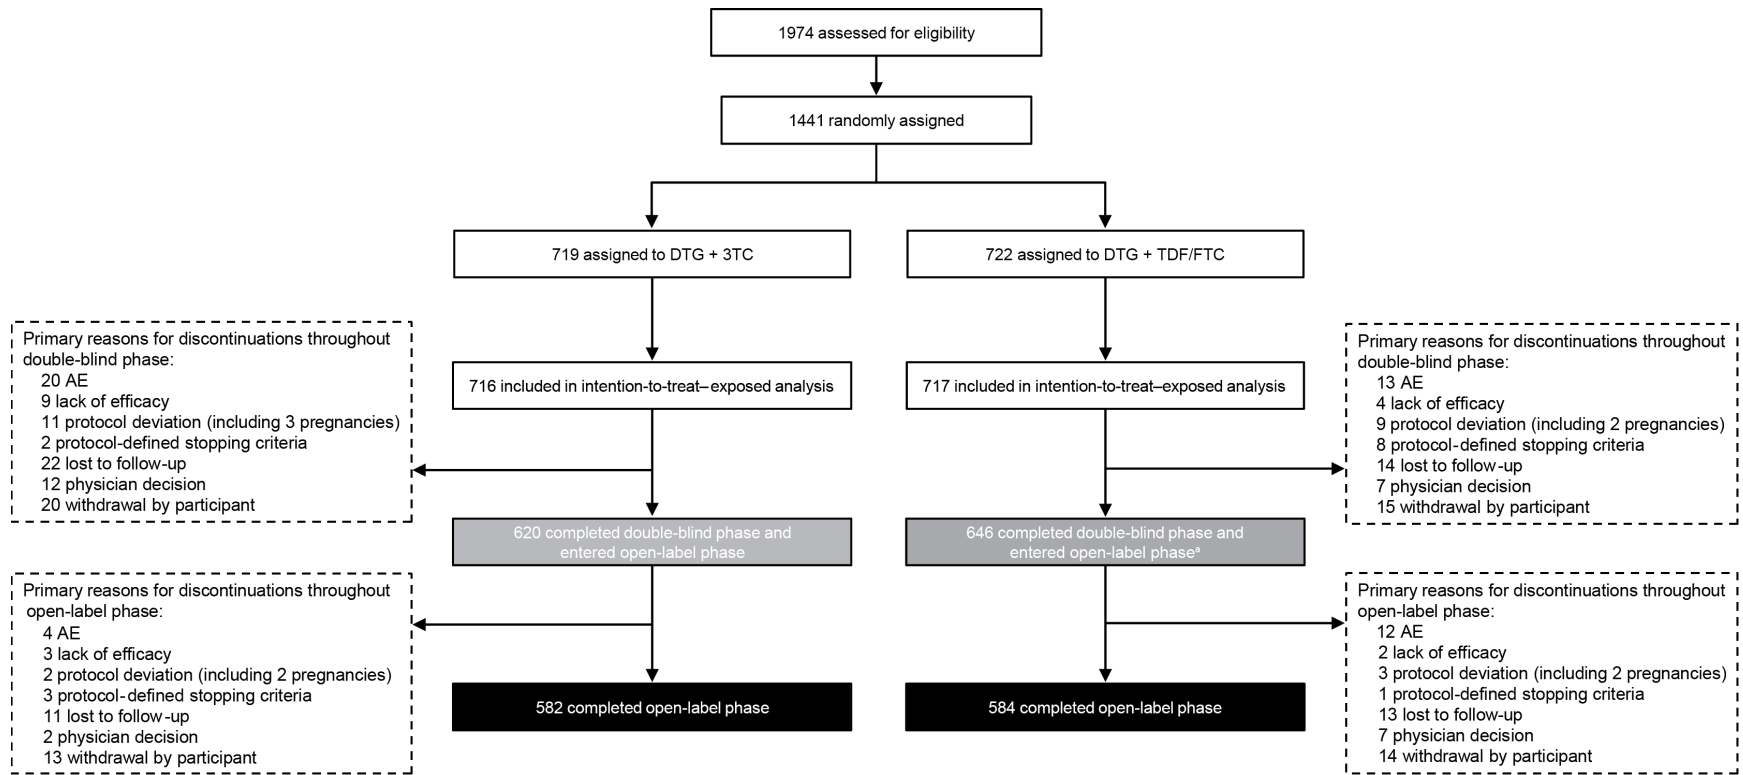

Supplement: aids-36-039-s002.pdf [file aids-36-039-s002.pdf]
