# Supplementary material for: Three-year durable efficacy of dolutegravir plus lamivudine in antiretroviral therapy – naive adults with HIV-1 infection
Source: PubMed Central journal article supplement — AIDS. 2021 Sep 15;36(1):39–48. doi: 10.1097/QAD.0000000000003070 (PMC8654248; doi:10.1097/qad.0000000000003070), 2021-09-15
Supplement: aids-36-039-s003.pdf [file aids-36-039-s003.pdf]

**Supplemental Digital Content 3.** Snapshot Outcomes at Week 144 in the ITT-E Population From GEMINI-1, GEMINI-2, and Pooled

| Snapshot outcome, n (%)                                   | GEMINI-1             |                             | GEMINI-2             |                             | Pooled               |                             |
|-----------------------------------------------------------|----------------------|-----------------------------|----------------------|-----------------------------|----------------------|-----------------------------|
|                                                           | DTG + 3TC<br>(N=356) | DTG +<br>TDF/FTC<br>(N=358) | DTG + 3TC<br>(N=360) | DTG +<br>TDF/FTC<br>(N=359) | DTG + 3TC<br>(N=716) | DTG +<br>TDF/FTC<br>(N=717) |
| HIV-1 RNA <50 copies/mL                                   | 281 (79)             | 296 (83)                    | 303 (84)             | 303 (84)                    | 584 (82)             | 599 (84)                    |
| HIV-1 RNA ≥50 copies/mL                                   | 14 (4)               | 11 (3)                      | 9 (3)                | 10 (3)                      | 23 (3)               | 21 (3)                      |
| Data in window and HIV-1 RNA ≥50 copies/mL                | 4 (1)                | 3 (1)                       | 0                    | 2 (<1)                      | 4 (<1)               | 5 (<1)                      |
| Discontinued for lack of efficacy                         | 4 (1)                | 3 (1)                       | 6 (2)                | 1 (<1)                      | 10 (1)               | 4 (<1)                      |
| Discontinued for other reason and HIV-1 RNA ≥50 copies/mL | 5 (1)                | 5 (1)                       | 2 (<1)               | 6 (2)                       | 7 (1)                | 11 (2)                      |
| Change in ART                                             | 1 (<1)               | 0                           | 1 (<1)               | 1 (<1)                      | 2 (<1)               | 1 (<1)                      |
| No virologic data at Week 144                             | 61 (17)              | 51 (14)                     | 48 (13)              | 46 (13)                     | 109 (15)             | 97 (14)                     |
| Discontinued study because of AE or death                 | 17 (5)               | 20 (6)                      | 12 (3)               | 12 (3)                      | 29 (4)               | 32 (4)                      |
| Discontinued study for other reasons                      | 42 (12)              | 30 (8)                      | 36 (10)              | 34 (9)                      | 78 (11)              | 64 (9)                      |
| Withdrew consent                                          | 14 (4)               | 11 (3)                      | 16 (4)               | 14 (4)                      | 30 (4)               | 25 (3)                      |
| Lost to follow-up                                         | 14 (4)               | 8 (2)                       | 11 (3)               | 11 (3)                      | 25 (3)               | 19 (3)                      |
| Protocol deviation                                        | 6 (2)                | 6 (2)                       | 5 (1)                | 3 (1)                       | 11 (2)               | 9 (1)                       |
| Physician decision                                        | 8 (2)                | 5 (1)                       | 3 (1)                | 5 (1)                       | 11 (2)               | 10 (1)                      |
| Lack of efficacy                                          | 0                    | 0                           | 1 (<1) <sup>a</sup>  | 1 (<1) <sup>a</sup>         | 1 (<1) <sup>a</sup>  | 1 (<1) <sup>a</sup>         |
| On study but missing data in window                       | 2 (<1)               | 1 (<1)                      | 0                    | 0                           | 2 (<1)               | 1 (<1)                      |

AE, adverse event; ART, antiretroviral therapy; CVW, confirmed virologic withdrawal; DTG, dolutegravir; FTC, emtricitabine; ITT-E, intention-to-treat–exposed; 3TC, lamivudine; TDF, tenofovir disoproxil fumarate.

<sup>a</sup>Participant had HIV-1 RNA <50 copies/mL after meeting CVW criteria.
