# Supplementary material for: Three-year durable efficacy of dolutegravir plus lamivudine in antiretroviral therapy – naive adults with HIV-1 infection
Source: PubMed Central journal article supplement — AIDS. 2021 Sep 15;36(1):39–48. doi: 10.1097/QAD.0000000000003070 (PMC8654248; doi:10.1097/qad.0000000000003070), 2021-09-15

**Supplemental Digital Content 5.** Snapshot and TRDF analyses of the percentage of participants in the pooled ITT-E population with HIV-1 RNA <50 copies/mL or without TRDF at Week 144 by baseline viral load and CD4+ cell count. DTG, dolutegravir; FTC, emtricitabine; ITT-E, intention-to-treat–exposed; 3TC, lamivudine; TDF, tenofovir disoproxil fumarate; TRDF, treatment-related discontinuation equals failure. <sup>a</sup>Percentages estimated from the TRDF Kaplan-Meier analysis.

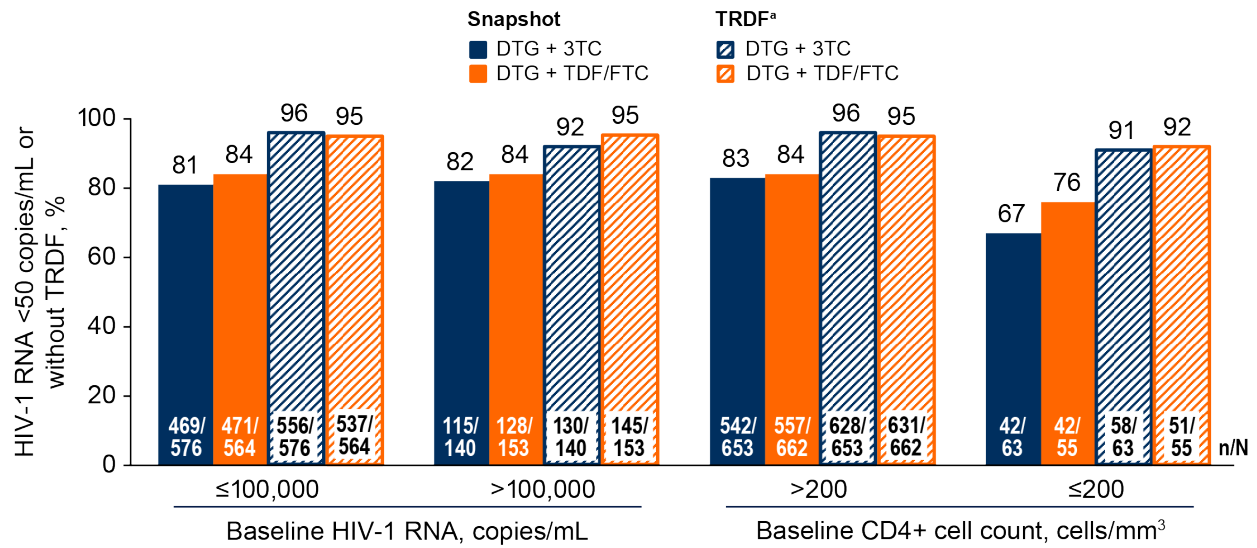

Supplement: aids-36-039-s005.pdf [file aids-36-039-s005.pdf]
