# Supplementary material for: Three-year durable efficacy of dolutegravir plus lamivudine in antiretroviral therapy – naive adults with HIV-1 infection
Source: PubMed Central journal article supplement — AIDS. 2021 Sep 15;36(1):39–48. doi: 10.1097/QAD.0000000000003070 (PMC8654248; doi:10.1097/qad.0000000000003070), 2021-09-15
Supplement: aids-36-039-s006.pdf [file aids-36-039-s006.pdf]

**Supplemental Digital Content 6.** Confirmed Virologic Withdrawals Through the Week 144 Analysis Window

| Week of failure confirmation | Baseline CD4+ cell count, cells/mm <sup>3</sup> | Time between SVW and CVW, day | Viral loads at baseline / SVW / CVW / and withdrawal, copies/mL | Resistance mutations         |                            | Fold change at baseline and CVW    |
|------------------------------|-------------------------------------------------|-------------------------------|-----------------------------------------------------------------|------------------------------|----------------------------|------------------------------------|
|                              |                                                 |                               |                                                                 | Baseline                     | SVW                        |                                    |
| <b>DTG + 3TC</b>             |                                                 |                               |                                                                 |                              |                            |                                    |
| Week 16                      | 212                                             | 7                             | 124,492 / 6648 / 56,435 / 95                                    | NRTI: none<br>INSTI: none    | NRTI: none<br>INSTI: none  | DTG, 0.67, 0.72<br>3TC, 1.13, 1.12 |
| Week 24                      | 284                                             | 28                            | 50,263 / 348 / 206 / 96                                         | NRTI: none<br>INSTI: none    | NRTI: none<br>INSTI: none  | DTG, 0.76, 0.7<br>3TC, 0.98, 0.69  |
| Week 24                      | 19                                              | 23                            | 368,439 / 212 / 376 / 362                                       | NRTI: none<br>INSTI: G193G/E | NRTI: none<br>INSTI: none  | DTG, 0.88, 0.86<br>3TC, 1.02, 1.43 |
| Week 24                      | 213                                             | 27                            | 96,277 / 451 / 9602 / 67                                        | NRTI: none<br>INSTI: none    | NRTI: none<br>INSTI: none  | DTG, 0.92, 0.8<br>3TC, 1.16, 1.16  |
| Week 24                      | 529                                             | 34                            | 17,232 / 461 / 251 / 59                                         | NRTI: none<br>INSTI: none    | NRTI: none<br>INSTI: none  | DTG, 0.81, 0.87<br>3TC, 1.17, 1.09 |
| Week 48                      | 414                                             | 22                            | 37,701 / 43,908 / 38,457 <sup>a</sup>                           | NRTI: none<br>INSTI: none    | NRTI: none<br>INSTI: none  | DTG, 0.8, 0.79<br>3TC, 0.9, 1.74   |
| Week 60                      | 347                                             | 101                           | 101,671 / 703 / 85,556 <sup>a</sup>                             | NRTI: none<br>INSTI: none    | NRTI: none<br>INSTI: none  | DTG, 0.89, 1.13<br>3TC, 0.95, 0.87 |
| Week 60                      | 567                                             | 21                            | 7654 / 3972 / 3131 / 1513                                       | NRTI: none<br>INSTI: none    | NRTI: none<br>INSTI: none  | DTG, 0.7, 0.71<br>3TC, 0.86, 0.86  |
| Week 72                      | 50                                              | 14                            | 63,817 / 422 / 2154 / 115                                       | NRTI: none<br>INSTI: none    | NRTI: none<br>INSTI: none  | DTG, 0.64, 0.81<br>3TC, 0.84, 0.69 |
| Week 72                      | 74                                              | 27                            | 112,812 / 61,076 / 87,794 / 671                                 | NRTI: none<br>INSTI: none    | NRTI: none<br>INSTI: none  | DTG, 0.84, 0.9<br>3TC, 0.84, 0.73  |
| Week 108                     | 317                                             | 31                            | 341,818 / 396 / 726 / 280                                       | NRTI: none<br>INSTI: L74I    | NRTI: none<br>INSTI: L74I  | DTG, 0.72, 0.83<br>3TC, 1.09, 1.04 |
| Week 120                     | 235                                             | 29                            | 370,321 / 1041 / 713 / <40                                      | NRTI: none<br>INSTI: G193E   | NRTI: none<br>INSTI: G193E | DTG, 0.91, 1.08<br>3TC, 0.84, 0.91 |
| <b>DTG + TDF/FTC</b>         |                                                 |                               |                                                                 |                              |                            |                                    |
| Week 12                      | 22                                              | 28                            | 136,753 / 393 / 276 <sup>b</sup>                                | NRTI: none<br>INSTI: none    | NRTI: none<br>INSTI: none  | DTG, 0.95, 1.03<br>TDF, 0.98, 0.99 |

|          |     |    |                                     |                              |                              |                                                                     |
|----------|-----|----|-------------------------------------|------------------------------|------------------------------|---------------------------------------------------------------------|
| Week 24  | 226 | 27 | 10,930 / 1136 / 809 / 264           | NRTI: none<br>INSTI: none    | NRTI: none<br>INSTI: none    | FTC, 0.86, 1.10<br>DTG, 0.72, NR<br>TDF, 1, 0.81<br>FTC, 0.92, 0.95 |
| Week 24  | 251 | 30 | 76,325 / 569 / 362 / <50            | NRTI: none<br>INSTI: none    | NRTI: none<br>INSTI: none    | DTG, 0.68, 1.38<br>TDF, 0.95, 0.61<br>FTC, 1.13, 0.67               |
| Week 24  | 201 | 28 | 156,701 / 213 / 1559 / 97           | NRTI: none<br>INSTI: none    | NRTI: none<br>INSTI: NR      | DTG, 0.9, NR<br>TDF, 1.04, 1.07<br>FTC, 0.97, 1.01                  |
| Week 48  | 602 | 83 | 1568 / 8384 / 3653 / 3011           | NRTI: K70K/E<br>INSTI: G193E | NRTI: none<br>INSTI: G193G/E | DTG, 1.05, 1.05<br>TDF, 0.76, 0.77<br>FTC, 1.14, 1.28               |
| Week 72  | 253 | 16 | 668,811 / 254 / 232 / 121           | NRTI: none<br>INSTI: none    | NRTI: none<br>INSTI: none    | DTG, 1.13, NR<br>TDF, 0.71, NR<br>FTC, 0.68, NR                     |
| Week 96  | 144 | 40 | 28,905 / 30,316 / 7793 <sup>a</sup> | NRTI: none<br>INSTI: L74I    | NRTI: none<br>INSTI: L74I    | DTG, 0.68, 0.78<br>TDF, 0.82, 0.82<br>FTC, 1.07, 0.95               |
| Week 108 | 524 | 24 | 9341 / 873 / 1728 / 657             | NRTI: none<br>INSTI: NR      | NRTI: none<br>INSTI: NR      | DTG, NR, NR<br>TDF, 0.63, 0.64<br>FTC, 0.74, 0.68                   |
| Week 132 | 121 | 26 | 27,227 / 214 / 213 / <40            | NRTI: none<br>INSTI: none    | NRTI: none<br>INSTI: none    | DTG, 1.02, 0.95<br>TDF, 0.86, 0.76<br>FTC, 0.86, 1.14               |

CVW, confirmed virologic withdrawal; DTG, dolutegravir; FTC, emtricitabine; INSTI, integrase strand transfer inhibitor; NR, not reported because of assay failure; NRTI, nucleoside reverse transcriptase inhibitor; SVW, suspected virologic withdrawal; 3TC, lamivudine; TDF, tenofovir disoproxil fumarate.

<sup>a</sup>Participant met CVW at the withdrawal visit; no subsequent visit occurred. <sup>b</sup>Participant met the criteria for CVW at Week 12 but was not reported at the Week 48 analysis because of a laboratory reporting error identified after the Week 48 analysis. This participant was not withdrawn as per protocol at the time and has been allowed to continue in the study (the participant has maintained virologic suppression from Week 24 through Week 132, met SVW criteria at Week 144, and was re-suppressed upon re-testing).
