# Supplementary material for: Three-year durable efficacy of dolutegravir plus lamivudine in antiretroviral therapy – naive adults with HIV-1 infection
Source: PubMed Central journal article supplement — AIDS. 2021 Sep 15;36(1):39–48. doi: 10.1097/QAD.0000000000003070 (PMC8654248; doi:10.1097/qad.0000000000003070), 2021-09-15

**Supplemental Digital Content 7.** Viral load by study visit for the participant who met SVW but not CVW criteria at Week 132 and developed resistance mutations M184V and R263R/K. Dashed lines at 50 and 200 copies/mL represent defined levels of virologic suppression and non-response, respectively. Data series plotted according to actual dates of HIV-1 RNA analysis testing. CVW, confirmed virologic withdrawal; IN, integrase; RT, reverse transcriptase; SVW, suspected virologic withdrawal; WT, wild-type.

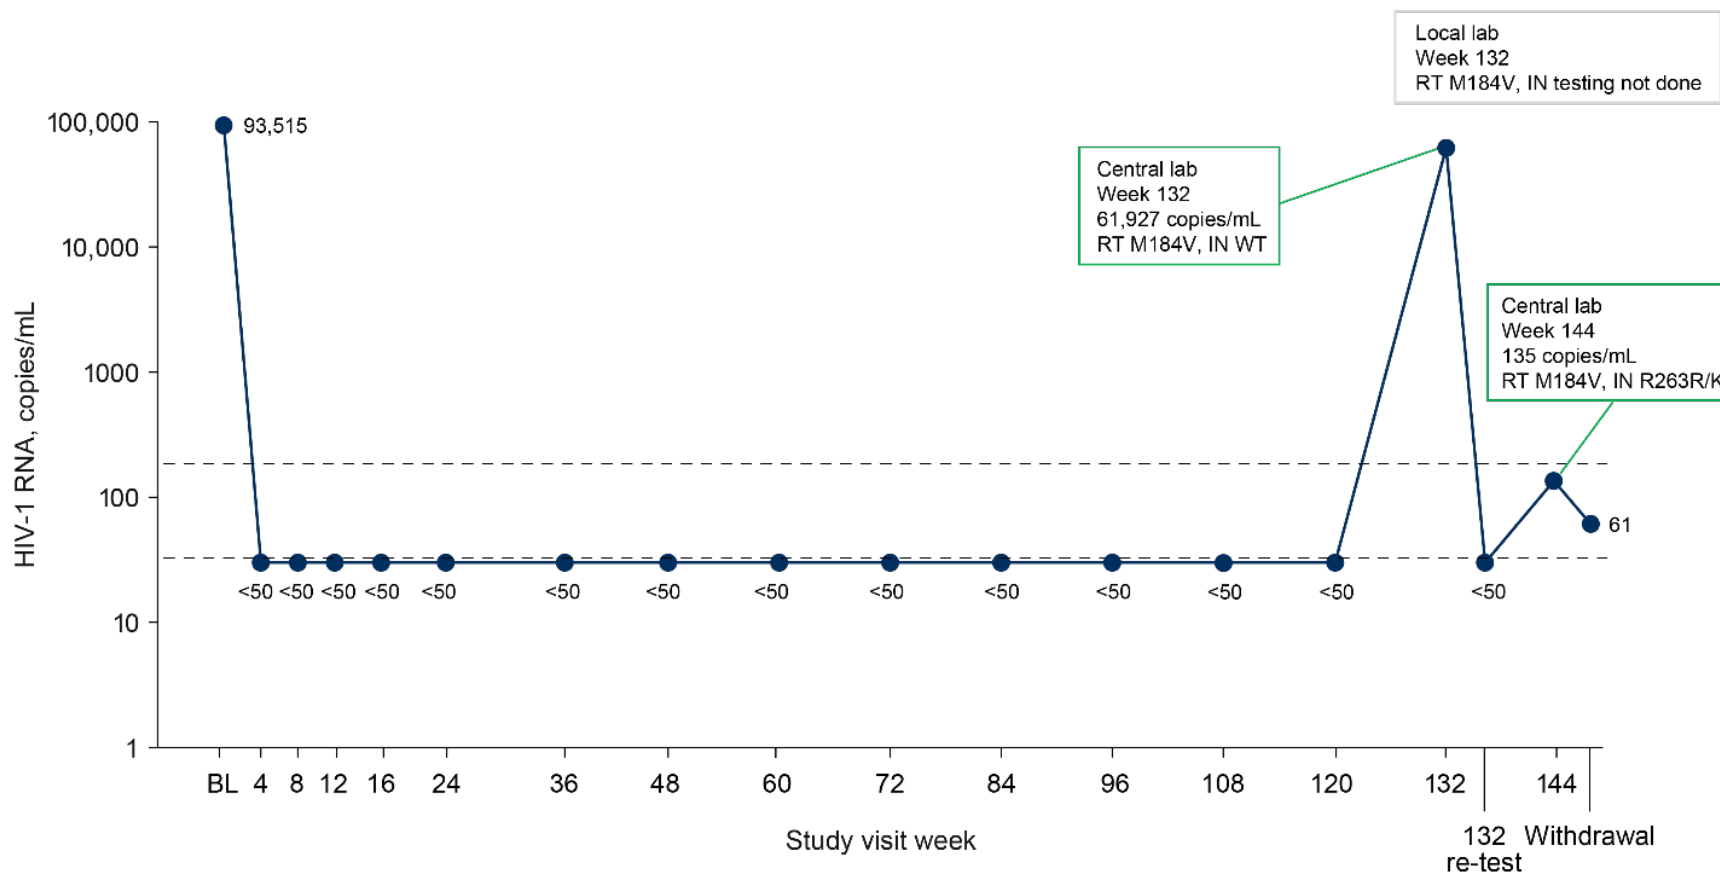

Supplement: aids-36-039-s007.pdf [file aids-36-039-s007.pdf]
