# Supplementary material for: Three-year durable efficacy of dolutegravir plus lamivudine in antiretroviral therapy – naive adults with HIV-1 infection
Source: PubMed Central journal article supplement — AIDS. 2021 Sep 15;36(1):39–48. doi: 10.1097/QAD.0000000000003070 (PMC8654248; doi:10.1097/qad.0000000000003070), 2021-09-15
Supplement: aids-36-039-s008.pdf [file aids-36-039-s008.pdf]

**Supplemental Digital Content 8.** EQ-5D-5L Health State Utility and VAS at Baseline and Week 144

|          | DTG + 3TC              |                        | DTG + TDF/FTC          |                        | Adjusted difference <sup>a</sup><br>(95% CI) | P value |
|----------|------------------------|------------------------|------------------------|------------------------|----------------------------------------------|---------|
|          | Baseline,<br>mean (SD) | Week 144,<br>mean (SD) | Baseline,<br>mean (SD) | Week 144, mean<br>(SD) |                                              |         |
| EQ-5D-5L | 0.95<br>(0.08)         | 0.97<br>(0.08)         | 0.94<br>(0.10)         | 0.96<br>(0.09)         | 0.004<br>(-0.003, 0.012)                     | 0.273   |
| VAS      | 86.5<br>(12.1)         | 91.0<br>(9.7)          | 85.1<br>(13.4)         | 89.4<br>(10.7)         | 1.2<br>(0.3, 2.2)                            | 0.012   |

DTG, dolutegravir; EQ-5D-5L, EuroQol-5 Dimensions-5 Levels; FTC, emtricitabine; 3TC, lamivudine; TDF, tenofovir disoproxil fumarate; VAS, visual analog scale.

<sup>a</sup>Statistical analysis of mean change from baseline using a mixed-effect repeated-measures model adjusting for study, treatment, baseline plasma HIV-1 RNA, baseline CD4+ cell count, and baseline score, treatment-by-visit interaction, and baseline score-by-visit interaction as factors and covariate, with visit as the repeated factor.
