# Supplementary material for: Three-year durable efficacy of dolutegravir plus lamivudine in antiretroviral therapy – naive adults with HIV-1 infection
Source: PubMed Central journal article supplement — AIDS. 2021 Sep 15;36(1):39–48. doi: 10.1097/QAD.0000000000003070 (PMC8654248; doi:10.1097/qad.0000000000003070), 2021-09-15

**Supplemental Digital Content 9.** Mean change from baseline in **(A)** weight and **(B)** BMI at Weeks 96 and 144 (data not collected at Week 48 visit) in the overall safety population and in **(C)** weight and **(D)** BMI at Week 144 by sex. BMI, body mass index; DTG, dolutegravir; FTC, emtricitabine; 3TC, lamivudine; TDF, tenofovir disoproxil fumarate.

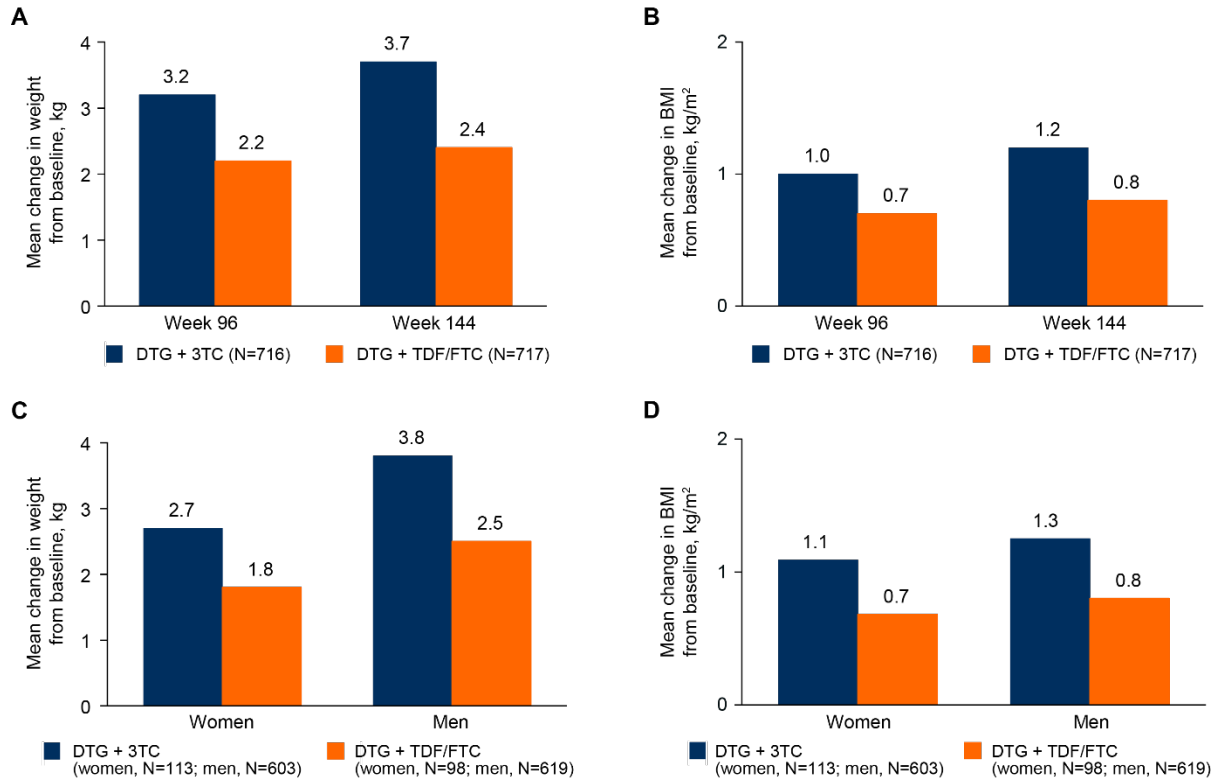

Supplement: aids-36-039-s009.pdf [file aids-36-039-s009.pdf]
