# Supplementary material for: Three-year durable efficacy of dolutegravir plus lamivudine in antiretroviral therapy – naive adults with HIV-1 infection
Source: PubMed Central journal article supplement — AIDS. 2021 Sep 15;36(1):39–48. doi: 10.1097/QAD.0000000000003070 (PMC8654248; doi:10.1097/qad.0000000000003070), 2021-09-15
Supplement: aids-36-039-s010.pdf [file aids-36-039-s010.pdf]

## Supplemental Digital Content 10

### GEMINI-1 and GEMINI-2 Investigators

**Argentina:** Cahn, Cassetti, David, Figueras, Losso, Lopardo, Lupo, Porteiro, Sánchez

**Australia:** Bloch, Kelleher, Koh, Lewis, McMahon, Moore, Roth, Shields

**Belgium:** De Wit, Florence, Goffard, Demeester, Lacor, Vandercam, Vandekerckhove

**Canada:** Angel, Baril, Conway, de Pokomandy, Szabo, Walmsley

**France:** Bouchaud, Chidiac, Delobel, Girard, Goujard, Katlama, Molina, Pialoux, Philibert

**Germany:** Bogner, Esser, Krznaric, Lehmann, Rockstroh, Spinner, Stellbrink, Stephan, Stoehr

**Italy:** Antinori, Barchi, Caramello, Castelli, Cattelan, d'Arminio Montforte, Di Biagio, Di Perri, Gulminetti, Lazzarin, Maggiolo, Menzaghi, Migliorino, Mussini, Penco, Puoti, Rizzardini, Sighinolfi, Viale

**Mexico:** Amaya Tapia, Andrade Villanueva, Granados Reyes, Sierra Madero, Perez Rios, Santoscoy Gomez

**Netherlands:** Den Hollander, Rijnders

**Peru:** Hidalgo, Hercilla, Illescas

**Poland:** Olczak

**Portugal:** Correia Pacheco, Mansinho, Saraiva da Cunha, Sarmento e Castro, Serrão, Teófilo

**Romania:** Arbune, Jianu, Oprea, Preotescu, Prisacariu

**Republic of Korea:** Lee, Kim S-W, Kim S-I, Kim WJ

**Russia:** Belonosova, Borodkina, Chernova, Gankina, Gusev, Kizhlo, Kulagin, Kurina, Nagimova, Pokrovsky, Ryamova, Voronin

**South Africa:** Kaplan

**Spain:** Antela Lopez, Arribas Lopez, Casado Osorio, Castaño Carracedo, De Los Santos Gil, Espinosa Aguilera, Estrada Perez, Falco Ferrer, Force, Galinda Puerto, Garcia Deltoro, Goenaga Sanchez, Gonzalez Cordon, Knobel, Lopez Bernaldo de Quiros, Losa Garcia, Masia

Canuto, Montero-Alonso, Ocampo Hermida, Pasquau Liaño, Portilla Sogorb, Pulido, Rivero Roman, Santos Fernandez, Torres Perea, Troya

**Switzerland:** Calmy, Fehr, Hauser

**Taiwan:** Cheng, Huang, Hung, Ko, Lu, Tseng, Wang, Wu, Yang

**United Kingdom:** Clarke, Gazzard, Fox, Johnson, Kegg, Khoo, Mazhude, Orkin, Schembri, Ustianowski

**USA:** Arduino, Benson, Berhe, Bredeek, Brinson, Campbell, Crofoot, Cunningham, DeJesus, Dretler, Eron, Fichtenbaum, Flamm, Goldstein, Gupta, Hagins, Hoffman-Terry, Jayaweera, Kinder, Klein, McDonald, Mills, Nahass, Ortiz, Osiyemi, Overton, Parks, Prelutsky, Ramgopal, Schrader, Sha, Simon, Sims, Skiest, Slim, Tashima, Thedinger
